# Supplementary material for: Phase I clinical trial of the combination of eribulin and everolimus in patients with metastatic triple-negative breast cancer
Source: Springer Nature journal article supplement (doi:10.1186/s13058-019-1202-4), 2019-11-08

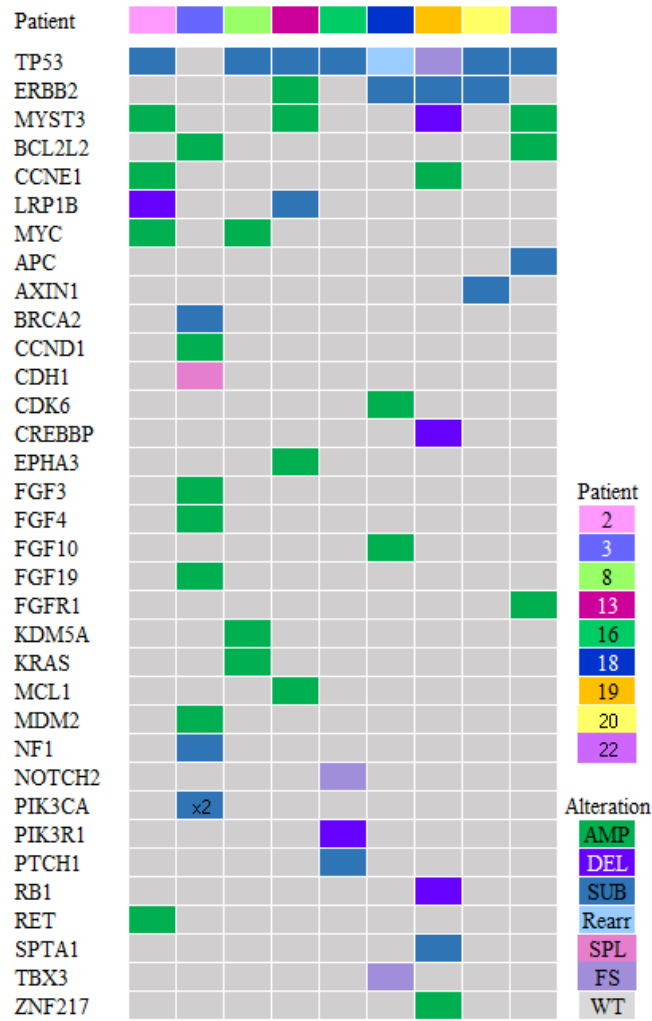

Supplement: MOESM3 [file 17367408]
